# Supplementary material for: Polygodial, a Sesquiterpene Dialdehyde, Activates Apoptotic Signaling in Castration-Resistant Prostate Cancer Cell Lines by Inducing Oxidative Stress
Source: MDPI journal article supplement (doi:10.3390/cancers14215260), 2022-10-26

**PC3-TXR**

PC3-TXR

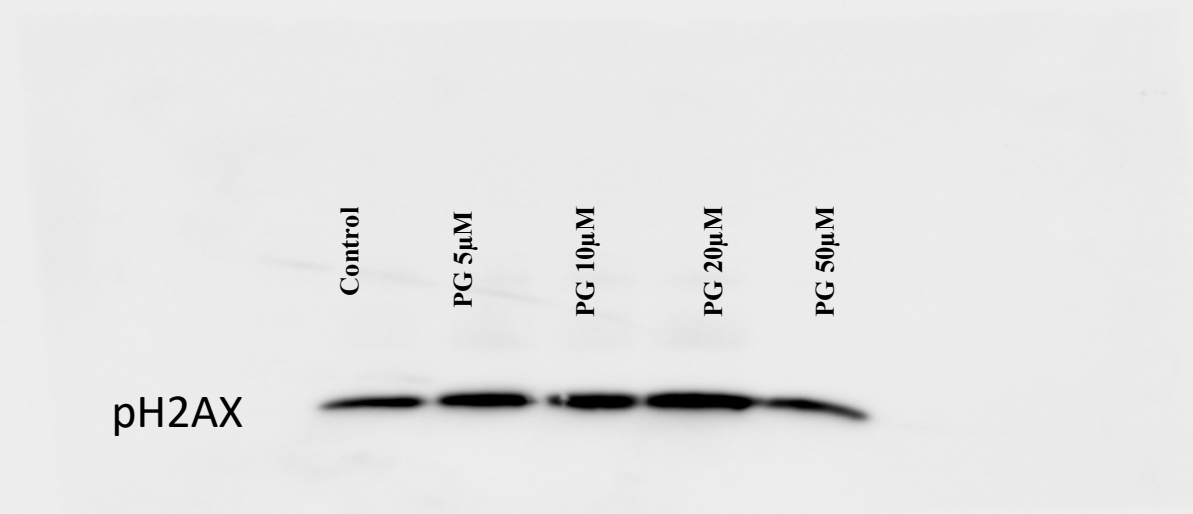

PC3-TXR

PARP1

Control  
PG 5μM  
PG 10μM  
PG 20μM  
PG 50μM

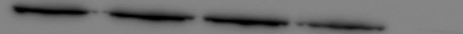

PC<sub>3</sub>-TxR  
Caspase-3  
30 sec  
Anti-rabbit  
3/15/19  
MW-35, 19, 17 k

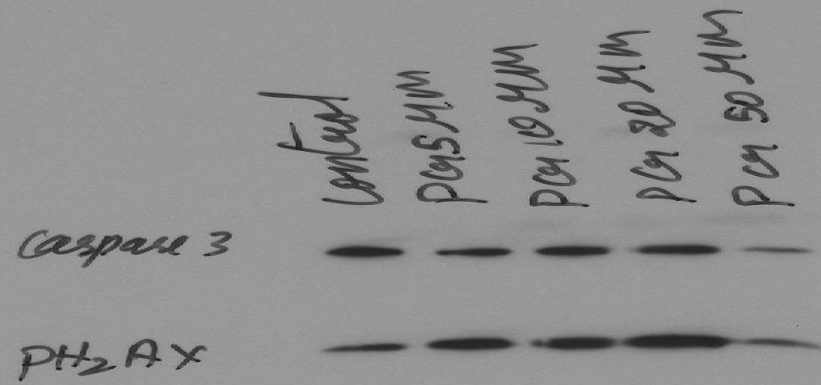

PC3-TXR

PC3-TXR  
XIAP (Rabbit)  
PG, treated  
4/21/9  
1 sec

XIAP

control

PG 5M

PG 10M

PG 20M

PG 50M

PC3-TXR

PC3-TXR  
Penicillin  
CIAP-2  
4/23/12

clAP-2

Control  
P6.5M  
P6.10M  
P6.20M  
P6.50M

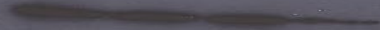



PC3-TXR

$\beta$ -actin

Control

PG 5 $\mu$ M

PG 10 $\mu$ M

PG 20 $\mu$ M

PG 50 $\mu$ M

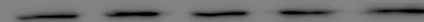

**Cleaved PARP1**

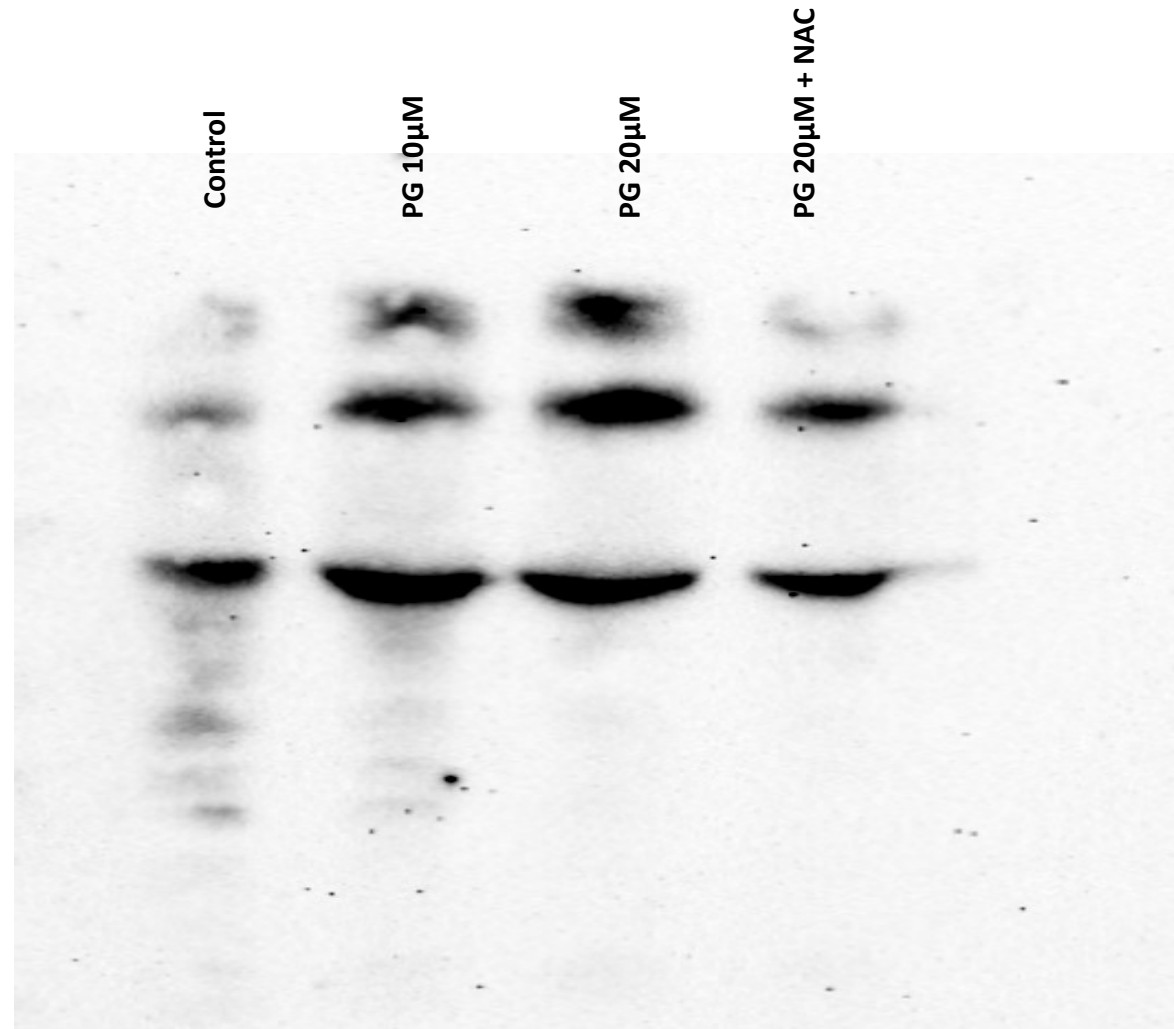



# Beta- actin

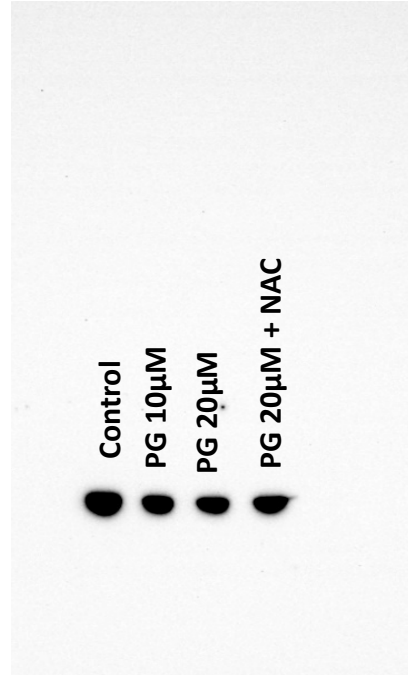

**DU145-TXR**

**DU145-TXR**

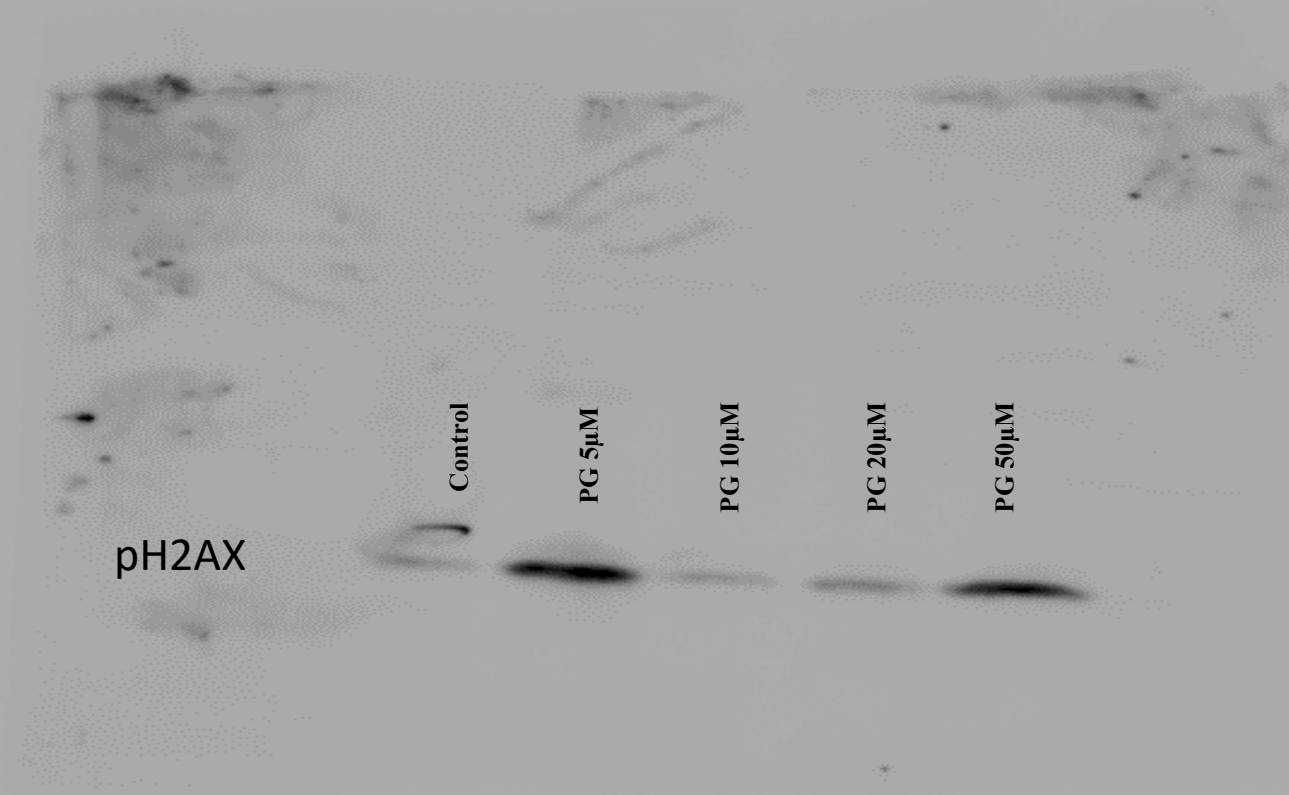

DU145-TXR

DU145-TXR  
PARP-1  
20mins  
anti-mouse  
3/15/19  
MW - 100, 89kDa

PARP-1

Control  
PG 5µM  
PG 10µM  
PG 20µM  
PG 50µM

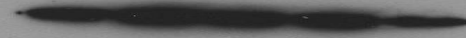

DU145-TXR

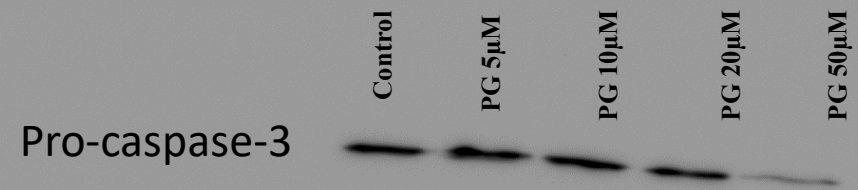

DU145-TXR

DU145 TXR  
XIAP (Rabbit)  
30sec (53kDa)  
PCR treated  
04/08/17

XIAP

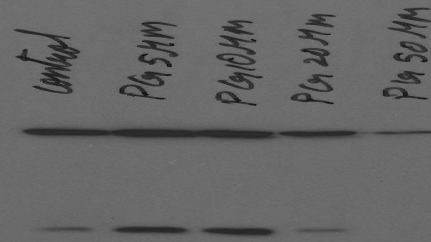



DU145-TXR

DU145 TXR  
CIAP-2 (Rabbit)  
45 mins  
4/10/19  
MW-68 kDa

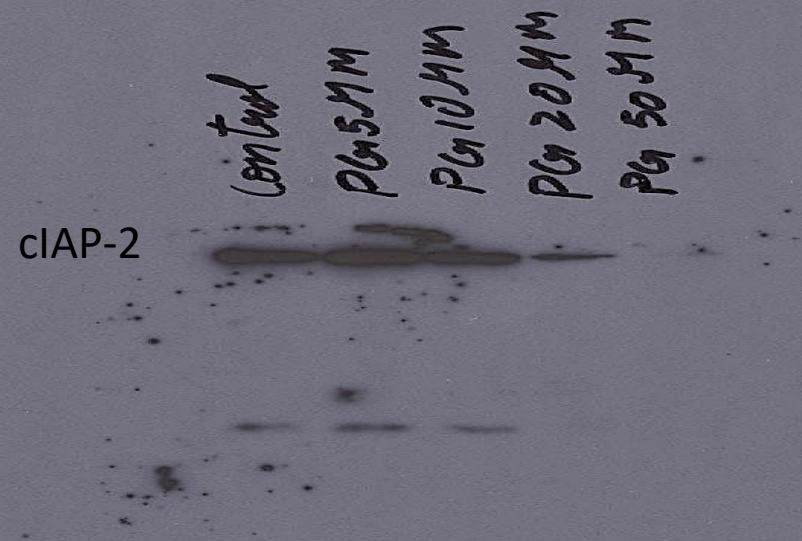

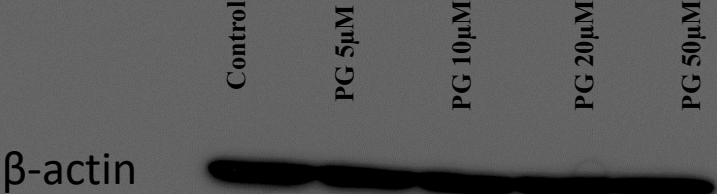

Cleaved PARP1

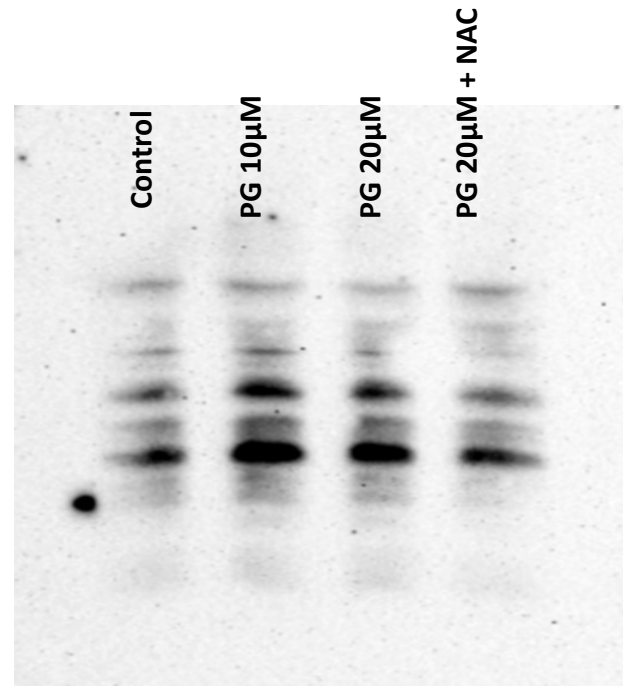



Beta- actin

Control  
PG 10 $\mu$ M  
PG 20 $\mu$ M  
PG 20 $\mu$ M + NAC

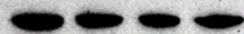

Supplement: s1 [file s1]
